# Supplementary material for: Clustering of time-course gene expression profiles using normal mixture models with autoregressive random effects
Source: PubMed Central journal article supplement (PMC3574839; doi:10.1186/1471-2105-13-300), 2012-11-14
Supplement: 1471-2105-13-300-S1.pdf [file 1471-2105-13-300-S1.pdf]

# Clustering of time-course gene expression profiles using normal mixture models with autoregressive random effects

Kui Wang<sup>1</sup>, Shu Kay Ng<sup>2</sup> and Geoffrey J McLachlan\*<sup>1</sup>

<sup>1</sup>Department of Mathematics, University of Queensland, Brisbane, QLD 4072, Australia

<sup>2</sup>School of Medicine, Griffith Health Institute, Griffith University, Meadowbrook, QLD 4131, Australia

Email: K Wang - kwang@maths.uq.edu.au; S K Ng - s.ng@griffith.edu.au; G J McLachlan\* - g.mclachlan@uq.edu.au;

\*Corresponding author

## Joint distribution

Concerning the fitting of the EMMIX-WIRE model in the main text, we assume  $\mathbf{y}^h = (\mathbf{y}_{h1}^T, \dots, \mathbf{y}_{hn_h}^T)^T$  are from the  $h$ th cluster, where  $n_h$  is the number of observations that belong to the  $h$ th cluster ( $h = 1, \dots, g$ ).

The joint distribution of  $\mathbf{y}^h$  and the random effects  $u_{jh}$ , and  $v_h$  is given by

$$\begin{bmatrix} u_{jh} \\ v_h \\ \mathbf{y}^h \end{bmatrix} \sim N \left( \begin{bmatrix} \mathbf{0} \\ \mathbf{0} \\ W \end{bmatrix}, \begin{bmatrix} \theta_h A_h & \mathbf{0} & V_{13} \\ \mathbf{0}^T & D_h & V_{23} \\ V_{13}^T & V_{23}^T & V_{33} \end{bmatrix} \right), \quad (1)$$

where

$$\begin{aligned} W &= \mathbf{1}_{n_h} \otimes (X_h \beta_h), \\ V_{13} &= \mathbf{1}_{n(j)}^T \otimes (\theta_h A_h Z_1^T), \\ V_{23} &= \mathbf{1}_{n(j)}^T \otimes (D_h Z_2^T), \\ V_{33} &= I_{n_h} \otimes \Sigma_h + J_{n_h} \otimes B_h. \end{aligned}$$

In the above formula, we have  $\Sigma_h = \Omega_h + \theta_h Z_1 A_h Z_1^T$ ,  $B_h = Z_2 D_h Z_2^T$ ,  $\mathbf{1}_{n_h}$  is the  $n_h$  dimensional vector of one,  $\mathbf{1}_{n(j)}$  is the vector with  $j$ th element as one and others zeros, and  $I_{n_h}$  is the identity matrix and  $J_{n_h}$  is the  $n_h$  by  $n_h$  matrix with all elements as ones. In addition, it can be proved that

$$(I_{n_h} \otimes \Sigma_h + J_{n_h} \otimes B_h)^{-1} = I_{n_h} \otimes \Sigma_h^{-1} - J_{n_h} \otimes C_h,$$

where

$$C_h = \Sigma_h^{-1} B_h (\Sigma_h + n_h B_h)^{-1}$$

and

$$n_h C_h = \Sigma_h^{-1} - (\Sigma_h + n_h B_h)^{-1}.$$

These equations are required in the E-step of the EM algorithm.

## The E-step: Conditional expectations

In the EM framework for the proposed mixture model, we have

$$\begin{aligned}\Sigma_h^{(r)} &= \Omega_h^{(r)} + \theta_h^{(r)} Z_1 A_h^{(r)} Z_1^T, \\ B_h^{(r)} &= Z_2 D_h^{(r)} Z_2^T, \\ M_h^{(r)} &= (\Sigma_h^{(r)} + n_h^{(r)} B_h^{(r)})^{-1}, \\ n_h^{(r)} &= \sum_{i=1}^n \tau_{jh}^{(r)}.\end{aligned}$$

From Ng et al. [1], it follows that the posterior probability  $\tau_{jh}$  at the  $r$ th iteration is given by

$$\begin{aligned}\tau_{jh}^{(r)} &= P(z_{jh} = 1 | y, \Psi^{(r)}) \\ &= \pi_h^{(r)} f_h(y_j; \Psi^{(r)}) / \sum_{h=1}^g \pi_h^{(r)} f_h(y_j; \Psi^{(r)}).\end{aligned}$$

In the E-step of the EM algorithm, we have to calculate

$$\begin{aligned}u_{jh}^{(r)} &= E(u_{jh} | y, \Psi^{(r)}) \\ &= \theta_h^{(r)} A_h^{(r)} Z_1^T \Sigma_h^{(r)-1} (y_j - X_h \beta_h^{(r)}) \\ &\quad - \theta_h^{(r)} A_h^{(r)} Z_1^T \Sigma_h^{(r)-1} B_h^{(r)} M_h^{(r)} \sum_{j=1}^n \tau_{jh}^{(r)} (y_j - X_h \beta_h^{(r)}), \\ S_{uh}^{(r)} &= \text{cov}(u_{jh} | y, \Psi^{(r)}) \\ &= \theta_h^{(r)} A_h^{(r)} - (\theta_h^{(r)})^2 A_h^{(r)} Z_1^T M_h^{(r)} Z_1 A_h^{(r)} \\ &\quad - (\sum_{j=1}^n \tau_{jh}^{(r)} - 1) (\theta_h^{(r)})^2 A_h^{(r)} Z_1^T \Sigma_h^{(r)-1} Z_1 A_h^{(r)}, \\ v_h^{(r)} &= E(v_h | y, \Psi^{(r)}) \\ &= D_h^{(r)} Z_2^T M_h^{(r)} \sum_{j=1}^n \tau_{jh}^{(r)} (y_j - X_h \beta_h^{(r)}), \\ S_{vh}^{(r)} &= \text{cov}(v_h | y, \Psi^{(r)}) \\ &= D_h^{(r)} - D_h^{(r)} Z_2^T M_h^{(r)} Z_2 D_h^{(r)} \sum_{j=1}^n \tau_{jh}^{(r)},\end{aligned}$$

$$\begin{aligned}
\epsilon_{jh}^{(r)} &= \text{cov}(\epsilon_{jh}|y, \Psi^{(r)}) \\
&= y_j - X_h \beta_h^{(r)} - Z_1 u_{jh}^{(r)} - Z_2 v_h^{(r)}, \\
S_{eh}^{(r)} &= \text{cov}(\epsilon_{jh}|y, \Psi^{(r)}) \\
&= \left( \sum_{j=1}^n \tau_{jh}^{(r)} \right) \Omega_h^{(r)} - \Omega_h^{(r)} M_h^{(r)} \Omega_h^{(r)} \\
&\quad - \left( \sum_{j=1}^n \tau_{jh}^{(r)} - 1 \right) \Omega_h^{(r)} \Sigma_h^{(r)-1} \Omega_h^{(r)}.
\end{aligned}$$

In addition, we need to calculate the following conditional expectations in order to obtain the  $Q$ -function.

$$\begin{aligned}
E(\epsilon_{jh}^T \Omega_h^{-1} \epsilon_{jh} | y, \Psi^{(r)}) &= \text{trace}(\Omega_h^{(r)-1} E(\epsilon_{jh} \epsilon_{jh}^T | y, \Psi^{(r)})), \\
E(u_{jh}^T A_h^{-1} u_{jh} | y, \Psi^{(r)}) &= \text{trace}(A_h^{(r)-1} E(u_{jh} u_{jh}^T | y, \Psi^{(r)})), \\
E(v_h^T D_h^{-1} v_h | y, \Psi^{(r)}) &= \text{trace}(D_h^{(r)-1} E(v_h v_h^T | y, \Psi^{(r)})),
\end{aligned}$$

which can be obtained via the relations between the conditional expectations, such as,

$$E(\epsilon_{jh} \epsilon_{jh}^T) = \text{cov}(\epsilon_{jh}) + E(\epsilon_{jh}) E(\epsilon_{jh}^T).$$

## The M-step: Estimation of Parameters

In the M-step of the EM algorithm, we update the estimates that maximize the  $Q$ -function with respect to  $\Psi^{(r)}$ . With the conditional expectations given in the previous section, the updating formulae for  $\Psi^{(r+1)}$  are given by

$$\begin{aligned}
\pi_h^{(r+1)} &= \sum_{j=1}^n \tau_{jh}^{(r)} / n, \\
\beta_h^{(r+1)} &= \beta_h^{(r)} + G_h^{(r)} \sum_{j=1}^n \tau_{jh}^{(r)} (y_j - X_h \beta_h^{(r)}) / \sum_{j=1}^n \tau_{jh}^{(r)}, \\
G_h^{(r)} &= [X_h X_h^T]^{-1} X_h^T M_h^{(r)} \Omega_h^{(r)}, \\
\Omega_h^{(r+1)} &= \sum_{j=1}^n \tau_{jh}^{(r)} \epsilon_{jh}^{(r)} \epsilon_{jh}^{(r)T} / \sum_{j=1}^n \tau_{jh}^{(r)} + S_{eh}^{(r)}, \\
D_h^{(r+1)} &= v_h^{(r)} v_h^{(r)T} + S_{vh}^{(r)}.
\end{aligned}$$

It is noted that  $\Omega_h^{(r+1)}$  and  $D_h^{(r+1)}$  may have special structures such as those given in Ng et al. [1]. For the estimation of AR(1) components, after the simplification that is analogous to that for the log-normal survival model with correlated frailty [2], we have

$$\theta_h^{(r+1)} = [(1 + \rho_h^{(r)2})L_{1h} - 2\rho_h^{(r)}L_{2h} - \rho_h^{(r)2}L_{3h}]/(m \sum_{j=1}^n \tau_{jh}^{(r)}),$$

where  $L_{1h} = \text{trace}(IV_h^{(r)})$ ,  $L_{2h} = \text{trace}(HV_h^{(r)})$ , and  $L_{3h} = \text{trace}(KV_h^{(r)})$ , and where  $V_h^{(r)} = \sum_{j=1}^n \tau_{jh}^{(r)}(u_{jh}^{(r)}u_{jh}^{(r)T} + S_{uh}^{(r)})$  and  $I$ ,  $H$  and  $K$  are  $m$  by  $m$  matrices, where  $I$  is the identity matrix;  $H$  has its sub-diagonal entries ones and zeros elsewhere;  $K$  takes on the value 1 at the first and last element of its principal diagonal and zeros elsewhere.

Estimation of the correlation parameter  $\rho_h$  requires solving the cubic equation,

$$c_{1h}\rho^3 + c_{2h}\rho^2 + c_{3h}\rho + c_{4h} = 0,$$

where  $c_{1h} = (m - 1)(L_{1h} - L_{3h})$ ,  $c_{2h} = (2 - m)L_{2h}$ ,  $c_{3h} = mL_{3h} - (m + 1)L_{1h}$  and  $c_{4h} = mL_{2h}$ . Standard numerical algorithms such as Newton-Raphson may be used to solve for  $\rho_h^{(r+1)}$ .

Sometimes all components may share common AR(1) parameters, in which case, we just replace  $V_h^{(r)}$  with

$$V_h^{(r)} = \sum_{h=1}^g \sum_{j=1}^n \tau_{jh}^{(r)}(u_{jh}^{(r)}u_{jh}^{(r)T} + S_{uh}^{(r)})$$

in the above approach. The common AR(1) parameters are then obtained using the same formula above.

## References

1. Ng SK, McLachlan GJ, Wang K, B T Jones L, Ng SW: **A mixture model with random-effects components for clustering correlated gene-expression profiles.** *Bioinformatics* 2006, **22**:1745–1752.
2. Yau KKW, McGilchrist CA: **ML and REML estimation in survival analysis with time dependent correlated frailty.** *Statistics in Medicine* 1998, **17**:1201–1213.
